# Supplementary material for: Thio-, seleno- and telluro-ether complexes of aluminium(iii) halides: synthesis, structures and properties
Source: Royal Society of Chemistry journal article supplement (doi:10.1039/c3dt52991f), 2014-01-01
Supplement: c3dt52991f.pdf [file c3dt52991f.pdf]

## Thio-, seleno- and telluro-ether complexes of aluminium(III) halides: synthesis, structures and properties

Kathryn George, Marek Jura, William Levason, Mark E. Light and Gillian Reid

### **[*o*-C<sub>6</sub>H<sub>4</sub>CH<sub>2</sub>Se(Me)CH<sub>2</sub>][AlCl<sub>4</sub>]:**

*o*-C<sub>6</sub>H<sub>4</sub>(CH<sub>2</sub>SeMe)<sub>2</sub> (0.12 g, 0.38 mmol) was added dropwise to a suspension of AlCl<sub>3</sub> (0.10 g, 0.75 mmol) in anhydrous CH<sub>2</sub>Cl<sub>2</sub> (10 mL) with stirring to give a yellow solution. After 30 minutes all solvent was removed *in vacuo* to yield an orange oil. On standing, crystals suitable for X-ray diffraction formed in the oil. Yield 0.17 g, 78%. <sup>27</sup>Al NMR (CDCl<sub>3</sub>, 295 K): 103.0. <sup>77</sup>Se NMR (CDCl<sub>3</sub>, 295 K): 383. IR (cm<sup>-1</sup>, Nujol): 491(s), 348(w). ES<sup>+</sup> MS (MeCN): *m/z* = 199 [*o*-C<sub>6</sub>H<sub>4</sub>CH<sub>2</sub>Se(Me)CH<sub>2</sub>]<sup>+</sup>; ES<sup>-</sup> MS (MeCN): *m/z* = 169 [AlCl<sub>4</sub>]<sup>-</sup>.

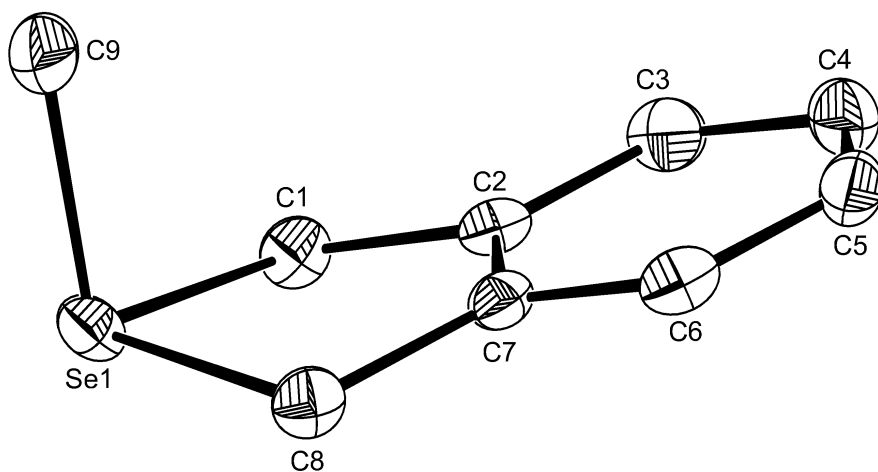

Fig S1. The structure of the cation in [C<sub>9</sub>H<sub>11</sub>Se][AlCl<sub>4</sub>] showing the atom numbering scheme. Ellipsoids are drawn at the 50% probability level and H atoms are omitted for clarity. The molecule has 2-fold symmetry. Symmetry operation:  $a = -x, y, 1/2 - z$ .

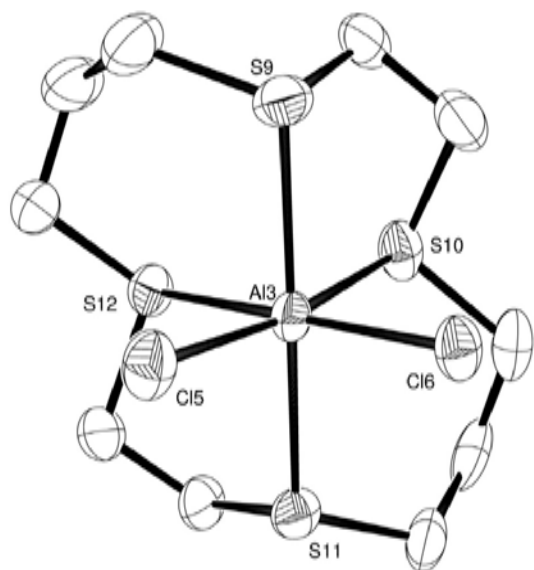

Fig S2. View of one of the cations in  $[\text{AlCl}_2([\text{14]aneS}_4)][\text{AlCl}_4]$  showing the atom labelling scheme. The displacement ellipsoids are drawn at the 50% probability level and H atoms are omitted for clarity.

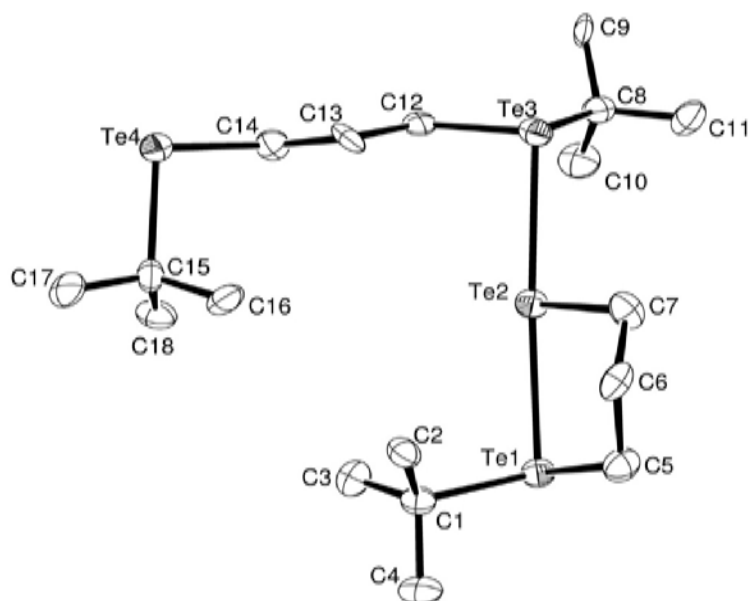

Fig S3 Structure of the cation in  $[\text{tBuTe}(\text{CH}_2)_3\text{Te}(\text{tBu})\text{Te}(\text{CH}_2)_3\text{Te}^{\text{tBu}}][\text{AlCl}_4]$ . Ellipsoids are shown at the 40% probability level and H atoms are omitted for clarity. Selected bond lengths ( $\text{\AA}$ ) and angles ( $^\circ$ ):  $\text{Te1-Te2} = 2.937(2)$ ,  $\text{Te2-Te3} = 2.990(2)$ ,  $\text{Te1-Te2-Te3} = 170.33(6)$ .

Table S1 X-ray data for [*o*-C<sub>6</sub>H<sub>4</sub>CH<sub>2</sub>Se(Me)CH<sub>2</sub>][AlCl<sub>4</sub>], [AlCl<sub>2</sub>([14]aneS<sub>4</sub>)] [AlCl<sub>4</sub>] and [<sup>1</sup>BuTe(CH<sub>2</sub>)<sub>3</sub>Te(<sup>t</sup>Bu)Te (CH<sub>2</sub>)<sub>3</sub>Te<sup>t</sup>Bu] [AlCl<sub>4</sub>]

| Compound                                                                                      | [ <i>o</i> -C <sub>6</sub> H <sub>4</sub> CH <sub>2</sub> Se(Me)CH <sub>2</sub> ]<br>[AlCl <sub>4</sub> ] | [AlCl <sub>2</sub> ([14]aneS <sub>4</sub> )]<br>[AlCl <sub>4</sub> ]           | [ <sup>1</sup> BuTe(CH <sub>2</sub> ) <sub>3</sub> Te( <sup>t</sup> Bu)Te (CH <sub>2</sub> ) <sub>3</sub> Te <sup>t</sup> Bu]<br>[AlCl <sub>4</sub> ] |
|-----------------------------------------------------------------------------------------------|-----------------------------------------------------------------------------------------------------------|--------------------------------------------------------------------------------|-------------------------------------------------------------------------------------------------------------------------------------------------------|
| Formula                                                                                       | C <sub>9</sub> H <sub>11</sub> AlCl <sub>4</sub> Se                                                       | C <sub>10</sub> H <sub>20</sub> Al <sub>2</sub> Cl <sub>6</sub> S <sub>4</sub> | C <sub>18</sub> H <sub>39</sub> AlCl <sub>4</sub> Te <sub>4</sub>                                                                                     |
| <i>M</i>                                                                                      | 366.92                                                                                                    | 535.19                                                                         | 934.67                                                                                                                                                |
| crystal system                                                                                | monoclinic                                                                                                | monoclinic                                                                     | triclinic                                                                                                                                             |
| Space group                                                                                   | P2 <sub>1</sub> /c (no. 14)                                                                               | P2 <sub>1</sub> /n (no. 14)                                                    | P-1 (no. 2)                                                                                                                                           |
| <i>a</i> [Å]                                                                                  | 7.4218(19)                                                                                                | 21.849(2)                                                                      | 10.016(1)                                                                                                                                             |
| <i>b</i> [Å]                                                                                  | 14.027(3)                                                                                                 | 11.869(1)                                                                      | 12.524(2)                                                                                                                                             |
| <i>c</i> [Å]                                                                                  | 13.481(3)                                                                                                 | 26.054(2)                                                                      | 14.049(2)                                                                                                                                             |
| <i>α</i> [deg]                                                                                | 90                                                                                                        | 90                                                                             | 113.209(8)                                                                                                                                            |
| <i>β</i> [deg]                                                                                | 94.415(6)                                                                                                 | 100.82                                                                         | 90.417(6)                                                                                                                                             |
| <i>γ</i> [deg]                                                                                | 90                                                                                                        | 90                                                                             | 105.465(7)                                                                                                                                            |
| <i>U</i> [Å <sup>3</sup> ]                                                                    | 1399.2(6)                                                                                                 | 6636.3(9)                                                                      | 1548.3(3)                                                                                                                                             |
| <i>Z</i>                                                                                      | 4                                                                                                         | 4                                                                              | 2                                                                                                                                                     |
| <i>μ</i> (Mo Kα)<br>[mm <sup>-1</sup> ]                                                       | 3.477                                                                                                     | 1.226                                                                          | 4.109                                                                                                                                                 |
| total no. reflns                                                                              | 11574                                                                                                     | 21108                                                                          | 11817                                                                                                                                                 |
| unique reflns                                                                                 | 5425                                                                                                      | 11544                                                                          | 5448                                                                                                                                                  |
| <i>R</i> <sub>int</sub>                                                                       | 0.031                                                                                                     | 0.241                                                                          | 0.149                                                                                                                                                 |
| no. of params,<br>restraints                                                                  | 137, 0                                                                                                    | 644, 765                                                                       | 253, 144                                                                                                                                              |
| <i>R</i> <sub>1</sub> <sup>b</sup> [ <i>I</i> <sub>o</sub> ><br>2σ( <i>I</i> <sub>o</sub> )]  | 0.058                                                                                                     | 0.122                                                                          | 0.083                                                                                                                                                 |
| <i>R</i> <sub>1</sub> [all data]                                                              | 0.078                                                                                                     | 0.305                                                                          | 0.188                                                                                                                                                 |
| <i>wR</i> <sub>2</sub> <sup>b</sup> [ <i>I</i> <sub>o</sub> ><br>2σ( <i>I</i> <sub>o</sub> )] | 0.119                                                                                                     | 0.236                                                                          | 0.126                                                                                                                                                 |
| <i>wR</i> <sub>2</sub> [all data]                                                             | 0.132                                                                                                     | 0.335                                                                          | 0.162                                                                                                                                                 |
